# Supplementary material
Source: PubMed Central journal article supplement (PMC3415645)
Supplement: bph0166-0151-SD1.pdf [file bph0166-0151-SD1.pdf]

Supplementary table 1. Statistical comparison of agonist potencies ( $pEC_{50}$  values) for cAMP production at  $rCT_{(a)}$  receptors. Comparisons between agonists were performed using one-way ANOVA followed by Tukey's tests (N.S.  $P > 0.05$ ; \* $P < 0.05$ ; \*\* $P < 0.01$ ; \*\*\* $P < 0.001$ ).  $pEC_{50}$  values could not be determined for  $(Cys(ACM)^{2,7})h\alpha CGRP$  or  $(Cys(Et)^{2,7})h\alpha CGRP$ .

| <b>rCT<sub>(a)</sub></b>        | <b>rAmy</b> | <b>rCT</b> | <b>r<math>\alpha</math>CGRP</b> | <b>r<math>\beta</math>CGRP</b> | <b>rAM</b> | <b>rAM2</b> |
|---------------------------------|-------------|------------|---------------------------------|--------------------------------|------------|-------------|
| <b>rAmy</b>                     | -           | ***        | N.S.                            | N.S.                           | **         | **          |
| <b>rCT</b>                      | ***         | -          | ***                             | ***                            | ***        | ***         |
| <b>r<math>\alpha</math>CGRP</b> | N.S.        | ***        | -                               | N.S.                           | N.S.       | N.S.        |
| <b>r<math>\beta</math>CGRP</b>  | N.S.        | ***        | N.S.                            | -                              | N.S.       | N.S.        |
| <b>rAM</b>                      | **          | ***        | N.S.                            | N.S.                           | -          | N.S.        |
| <b>rAM2</b>                     | **          | ***        | N.S.                            | N.S.                           | N.S.       | -           |

Supplementary table 2. Statistical comparison of agonist potencies (pEC<sub>50</sub> values) for cAMP production at rAMY<sub>1(a)</sub> receptors.

Comparisons between agonists were performed using one-way ANOVA followed by Tukey's tests (N.S.  $P > 0.05$ ; \* $P < 0.05$ ; \*\* $P < 0.01$ ; \*\*\* $P < 0.001$ ). pEC<sub>50</sub> values could not be determined for (Cys(ACM)<sup>2,7</sup>)hαCGRP or (Cys(Et)<sup>2,7</sup>)hαCGRP.

| rAMY <sub>1(a)</sub> | rAmy | rCT  | rαCGRP | rβCGRP | rAM  | rAM2 |
|----------------------|------|------|--------|--------|------|------|
| rAmy                 | -    | *    | N.S.   | **     | ***  | ***  |
| rCT                  | *    | -    | N.S.   | N.S.   | ***  | N.S. |
| rαCGRP               | N.S. | N.S. | -      | N.S.   | ***  | ***  |
| rβCGRP               | **   | N.S. | N.S.   | -      | ***  | N.S. |
| rAM                  | ***  | ***  | ***    | ***    | -    | N.S. |
| rAM2                 | ***  | N.S. | ***    | N.S.   | N.S. | -    |
